# Supplementary material for: Cardiovascular Disease Burden in Persons with Mental Illness: Comparison between a U.S. Psychiatry Outpatient Sample and a U.S. General Population Sample
Source: Hindawi journal article supplement (doi:10.1155/2024/1689172), 2024-01-01
Supplement: f1 [file 1689172.f1.docx]

Supplementary Material

| *Supplementary Table 1.* Diagnostic Criteria for Cardiovascular Conditions and Risk Factors in the NHANES Sample | | |
| --- | --- | --- |
| *Variable Name & CVD Condition Variable Label* | | |
| MCQ160c  MCQ160d  MCQ160e | **Coronary Heart Disease** | Has a doctor or other health professional:  Ever told you had coronary heart disease?  Ever told you had angina/angina pectoris?  Ever told you had heart attack? |
| MCQ160b | **Congestive Heart Failure** | Ever told had congestive heart failure? |
| MCQ160f | **Stroke** | Ever told you had a stroke? |
| BPQ020  BPQ040A  BPXSY2  BPXSY3  BPXDI2  BPXDI3 | **Hypertension** | Ever told you had high blood pressure? or  Taking prescription for hypertension, or  Systolic Blood pressure ≥130 mmHg, or  (Average of 2nd and 3rd readings)  Diastolic Blood Pressure ≥ 80 mmHg  (Average of 2nd and 3rd readings) |
| DIQ010  DIQ050  DIQ070  LBXGLU  LBXGH | **Diabetes Mellitus** | Doctor told you have diabetes, or  Taking insulin now, or  Take diabetic pills to lower blood sugar, or  Fasting Plasma Glucose ≥126 (mg/dl), or  Glycohemoglobin ≥6.5 (%) |
| BPQ080  BPQ090D  LBXTR  LBDLDL  LBXTC  LBDHDD | **Dyslipidemia** | Doctor told you - high cholesterol level, or  Told to take prescription for cholesterol, or  Triglycerides >150 (mg/dl), or  LDL-C ≥130 (mg/dl), or  Total Cholesterol ≥220 (mg/dl), or  Direct HDL-C <50 in women, or <40 in men |
| SMQ020  SMQ040 | **Current Smoking** | Smoked at least 100 cigarettes in their lifetime ***AND***  Do you now smoke cigarettes (either every day or somedays)? |
| Data on CVD conditions and medications were participant-reported and collected as part of the home interview (CDC 2022a).  BP measurements and lab tests were performed in the NHANES mobile examination center. Diagnostic Criteria for CVD conditions and risk factors is based on DeBoer et al. 2017; Jacobson et al. 2015; and Tsao et al. 2022.  Fasting plasma glucose, triglycerides, and low-density lipoprotein cholesterol (LDL-C) measures were performed only on a subset of participants. Out of this subset, only those participants who were examined in the morning session and had fasted 8-23 hours before the MEC examination and had valid lab readings were assigned non-zero fasting sample weights and included in our diagnostic criteria. All other sampled participants examined in the morning session/afternoon session had zero/missing values for the fasting sample weight. For details see: CDC 2022a; CDC 2022b; and Johnson et al. 2013. | | |

| *Supplementary Table 2*. Comparisons of the Means and Proportions (95% CL) of CVD Metabolic Markers, Conditions, and Risk Factors in the PCARES* Sample to the Age-, Sex-, and Race-adjusted Means andProportions(95% CL) in the U.S. Population Sample (NHANES) | | | |
| --- | --- | --- | --- |
|  | ***PCARES**** | ***NHANES*** | ***P-value*†** |
|  | ***N=3556*** | ***N=11659*** |  |
| *Variable* | ***Mean (95% CL)*** | ***Mean (95% CL)*** |  |
| Age (years) | 42.36 (41.81, 42.92) | - | - |
| BMI (kg/m2) | 30.34 (30.06, 30.63) | 28.36 (27.95, 28.76) | 0.03 |
| Glucose (mg/dl) | 111.03 (109.17, 112.90) | 111.87 (109.13, 114.62) | 0.21 |
| Hemoglobin A1C (%) | 6.06 (5.98, 6.14) | 5.59 (5.53, 5.64) | 0.03 |
| Serum Cholesterol (mg/dl) | 185.48 (183.44, 187.52) | 181.79 (179.01, 184.58) | 0.03 |
| Serum Triglycerides (mg/dl) | 152.67 (147.04, 158.30) | 136.15 (126.37, 145.93) | 0.03 |
| Serum HDL-Cholesterol (mg/dl) | 48.56 (47.80, 49.31) | 41.39 (40.36, 42.42) | 0.03 |
| Serum LDL-Cholesterol (mg/dl) | 107.62 (105.89, 109.36) | 112.00 (108.54, 115.46) | 0.03 |
| *Variable* | ***Proportion*** ***(95% CL)*** | ***Proportion*** ***(95% CL)*** | ***P-value*†** |
| Heart Disease (CHD/angina) | 5.65 (4.89, 6.41) | 3.65 (2.79, 4.76) | 0.03 |
| Heart Failure | 2.78 (2.24, 3.32) | 0.81 (0.55, 1.19) | 0.03 |
| Any Heart Disease (CHD/Stroke/CHF) | 9.65 (8.68, 10.62) | 4.65 (3.69, 5.86) | 0.03 |
| Stroke | 4.19 (3.53, 4.85) | 1.05 (0.68, 1.60) | 0.03 |
| Dyslipidemia | 47.61 (45.97, 49.25) | 61.98 (58.68, 65.17) | 0.03 |
| Cholesterol-lowering Medications‡ | 47.84 (45.46, 50.22) | 35.62 (31.53, 39.92) | 0.03 |
| Type 2 Diabetes Mellitus | 20.33 (19.01, 21.65) | 10.39 (8.70, 12.37) | 0.03 |
| Anti-diabetic Medications‡ | 88.24 (85.90, 90.59) | 86.59 (80.01, 91.24) | 0.16 |
| Hypertension | 50.14 (48.50, 51.78) | 50.47 (46.68, 54.26) | 0.69 |
| Anti-hypertensive Medications‡ | 95.01 (94.00, 96.02) | 75.95 (69.30, 81.33) | 0.03 |
| Smoking§ | 21.95 (20.27, 23.63) | 25.05 (22.30, 28.01) | - |
| *PCARES results are based on the primary definition of the baseline study window (February 1, 2015 to one-year after the index date).  †P-value is based on one-sample t-test for means and one-sample chi-square test for proportions. The significance level (alpha) of 0.05 was adjusted for multiple comparisons using the Bonferroni correction. For the 17 CVD outcomes above, we adjusted the significance level to 0.003 (0.05/17). Therefore,  *p*<0.0001 were scaled by dividing 0.0001 by 0.003, which is equal to 0.03.  ‡Prescription medication prevalence includes only those persons with the diagnoses of that particular CVD risk factor.  §Smoking is reported, but the proportions are not directly compared as smoking was ascertained through different instruments and different questions in the two study populations. | | | |

**References**

Centers for Disease Control and Prevention. 2022a. National Center for Health Statistics. "National Health and Nutrition Examination Survey Data." Accessed April 20, 2022. <https://www.cdc.gov/nchs/nhanes/index.htm>

Centers for Disease Control and Prevention. 2022b. “National Health and Nutrition Examination Survey: Analytic Guidelines, 2011-2014 and 2015-2016.” Accessed April 1, 2022. Available at: <https://wwwn.cdc.gov/nchs/data/nhanes/analyticguidelines/11-16-analytic-guidelines.pdf>.

De Boer, Ian H., Sripal Bangalore, Athanase Benetos, Andrew M. Davis, Erin D. Michos, Paul Muntner, Peter Rossing, Sophia Zoungas, and George Bakris. 2017. “Diabetes and Hypertension: A Position Statement by the American Diabetes Association.” *Diabetes Care* 40 (9): 1273–84. <https://doi.org/10.2337/dci17-0026>.

Jacobson, Terry A., Matthew K. Ito, Kevin C. Maki, Carl E. Orringer, Harold E. Bays, Peter H. Jones, James M. McKenney, et al. 2015. “National Lipid Association Recommendations for Patient-Centered Management of Dyslipidemia: Part 1--Full Report.” *Journal of Clinical Lipidology* 9 (2): 129–69. <https://doi.org/10.1016/j.jacl.2015.02.003>

Johnson, Clifford L., Ryne Paulose-Ram, Cynthia L. Ogden, Margaret D. Carroll, Deanna Kruszon-Moran, Sylvia M. Dohrmann, and Lester R. Curtin. 2013. “National Health and Nutrition Examination Survey: Analytic Guidelines, 1999-2010.” *Vital and Health Statistics. Series 2, Data Evaluation and Methods Research*, no. 161 (September): 1–24.

Tsao, Connie W., Aaron W. Aday, Zaid I. Almarzooq, Alvaro Alonso, Andrea Z. Beaton, Marcio S. Bittencourt, Amelia K. Boehme, et al. 2022. “Heart Disease and Stroke Statistics—2022 Update: A Report From the American Heart Association.” *Circulation* 145 (8). <https://doi.org/10.1161/CIR.0000000000001052>
